# Supplementary material
Source: HighWire-hosted journal article supplement (https://qualitysafety.bmj.com/highwire/filestream/161296/field_highwire_adjunct_files/0/bmjqs-2020-012108supp001_data_supplement.pdf)
Supplement: bmjqs-2020-012108supp001_data_supplement.pdf [file bmjqs-2020-012108supp001_data_supplement.pdf]

### Supplementary I The formula for relative rate at different percentiles calculation

The relative ratio (RR) was calculated with formula

$$\frac{e^{(\text{linear predictor} + \phi^{-1}(0.95)\sigma)}}{e^{(\text{linear predictor} + \phi^{-1}(0.05)\sigma)}} = e^{(\phi^{-1}(0.95)\sigma - \phi^{-1}(0.05)\sigma)}$$
, where  $\phi^{-1}(p)$  represents corresponding Z-value from standard normal distribution as described by Abel et al.[1]

### Supplementary tables

Supplementary Table 1 shows the characteristics of patients consulting each clinician (case mix). It was based on the following characteristics: age, sex, Charlson co-morbidity index (which is a composite score based on chronic conditions [2]), flu vaccination in the one year before, the number of consultations in the one year before, referral in the year before, smoking history, number of non-AB prescription in the three years before and mean duration of consultations (as recorded by the EHR system). Supplementary Table 2 shows the distribution of the numbers of observations per clinician for the AB measures. The number of AB prescribed ranged by clinician from 86 (5<sup>th</sup> percentile) to 4304 (95<sup>th</sup> percentile). Supplementary Table 3 presents the values for Spearman correlations between various measures of AB prescribing, coding of common infections and consultation rates for common infections. Supplementary Table 4 presents the frequencies that clinicians exceeded prescribing percentile thresholds for six AB measures. If the median prescribing across all clinicians was used as threshold, 4.2% of the clinicians prescribed below the medians for all of the six AB measures. On the other hand, 4.8% of the clinicians prescribed above the medians for all these AB measures. The majority of clinicians (95.8%) prescribed at least one AB measure that was above the medians of their peers. When using a more permissive threshold (75<sup>th</sup> percentiles of AB measures), 76.1% of the clinicians prescribed above this 75<sup>th</sup> percentile for at least one AB measure.

**Supplementary Table 1: Case mix of patients consulting a clinician in general practice and extent of variability in case mix between clinicians**

|                                                             | Mean / %<br>(standard deviation) | 5 <sup>th</sup> percentile | median | 95 <sup>th</sup> percentile |
|-------------------------------------------------------------|----------------------------------|----------------------------|--------|-----------------------------|
| Children 0-14 years (%)                                     | 10 (5.2)                         | 4.0                        | 9.1    | 18.4                        |
| Adults 15-74 years (%)                                      | 75.8 (6.7)                       | 64.9                       | 76.1   | 85.6                        |
| Older Adults 75+ years (%)                                  | 14.2 (7.2)                       | 4.0                        | 13.4   | 27.0                        |
| Women (%)                                                   | 59.9 (8.3)                       | 47.0                       | 59.6   | 73.5                        |
| Charlson co-morbidity (%):                                  | 71.6 (7.9)                       | 58.6                       | 72.0   | 83.7                        |
| No (score 0)                                                |                                  |                            |        |                             |
| Low (1-2)                                                   | 22.8 (5.6)                       | 13.6                       | 22.7   | 31.8                        |
| Moderate (3-4)                                              | 4.5 (2.8)                        | 0.0                        | 4.1    | 9.4                         |
| High (5-6)                                                  | 0.8 (0.9)                        | 0.0                        | 0.6    | 2.6                         |
| Very high (7+)                                              | 0.3 (0.5)                        | 0.0                        | 0.0    | 1.1                         |
| Patients with co-morbidity standardised by age and sex (%)  | 25.8 (5.7)                       | 16.9                       | 25.6   | 35.0                        |
| Flu vaccination in one year before (%)                      | 33.0 (9.7)                       | 18.0                       | 32.7   | 49.1                        |
| Number of consultations in one year before (mean)           | 9.0 (3.4)                        | 5.0                        | 8.3    | 15.9                        |
| Smoking history:                                            | 50.6 (9.9)                       | 35.4                       | 50.1   | 67.7                        |
| Non-smoker (%)                                              |                                  |                            |        |                             |
| Current smoker (%)                                          | 23.7 (9.6)                       | 11.6                       | 22.3   | 41.5                        |
| Past smoker (%)                                             | 25.7 (7.7)                       | 12.0                       | 26.0   | 37.5                        |
| Number of non-AB prescriptions in three years before (mean) | 92.0 (38.3)                      | 39.5                       | 87.6   | 156.6                       |
| Duration of consultation (mean)                             | 10.8 (3.9)                       | 5.0                        | 10.7   | 17.4                        |

**Supplementary Table 2: Distribution of the numbers of observations per clinician for the main AB measures**

| AB measure                                                                         | Characteristic                                                          | 5 <sup>th</sup> percentile | median | 95 <sup>th</sup> percentile |
|------------------------------------------------------------------------------------|-------------------------------------------------------------------------|----------------------------|--------|-----------------------------|
| Crude AB prescribing rate <sup>§</sup>                                             | Numerator: number of AB prescribed                                      | 86                         | 666    | 4304                        |
|                                                                                    | Denominator: number of consultations                                    | 632                        | 4288   | 23372                       |
| Level of incidental AB prescribing (%)                                             | Numerator: number of AB prescribed without prior AB in 12 months before | 15                         | 189    | 1092                        |
|                                                                                    | Denominator: number of AB with one year prior follow-up                 | 39                         | 498    | 3300                        |
| Level of repeat AB courses: other AB in prior 30 days in patient prescribed AB (%) | Numerator: number AB with prior AB                                      | 12                         | 134    | 1100                        |
|                                                                                    | Denominator: number of AB prescribed                                    | 86                         | 666    | 4304                        |
| Number of prior ABs in three years before in patients prescribed an AB (mean)      | Mean number of AB with three years prior follow-up                      | 10                         | 295    | 1810                        |
| Use of broad spectrum AB types (%)                                                 | Numerator: number broad spectrum AB                                     | 31                         | 259    | 1694                        |
|                                                                                    | Denominator: number of AB prescribed                                    | 86                         | 666    | 4304                        |
| Patient risk of hospital admission / NNT                                           | Mean NNT in incidental AB users                                         | 48                         | 354    | 1996                        |
| Consultation rate for common infections <sup>§</sup>                               | Numerator: number of infections                                         | 62                         | 412    | 2324                        |
|                                                                                    | Denominator: number of consultations                                    | 632                        | 4288   | 23372                       |

<sup>§</sup>per 1000 consultations

**Supplementary Table 3: Spearman correlations between various measures of AB prescribing, coding of common infections and consultation rates for common infections**

|                                                                        | Standardised rate AB prescribing | Incidental AB prescribing | Repeat AB courses within 30 days | Number of prior ABs in three years before in patients prescribed an AB | Use of broad spectrum AB | Patient risk for hospital admission | Consultation rate for common infections | GP coding of common infections |
|------------------------------------------------------------------------|----------------------------------|---------------------------|----------------------------------|------------------------------------------------------------------------|--------------------------|-------------------------------------|-----------------------------------------|--------------------------------|
| Standardised rate AB prescribing                                       | 1.00                             | -                         | -                                | -                                                                      | -                        | -                                   | -                                       | -                              |
| Incidental AB prescribing                                              | 0.45                             | 1.00                      | -                                | -                                                                      | -                        | -                                   | -                                       | -                              |
| Repeat AB courses within 30 days                                       | 0.16                             | 0.04                      | 1.00                             | -                                                                      | -                        | -                                   | -                                       | -                              |
| Number of prior ABs in three years before in patients prescribed an AB | 0.12                             | 0.07                      | 0.53                             | 1.00                                                                   | -                        | -                                   | -                                       | -                              |
| Use of broad spectrum AB                                               | 0.12                             | 0.30                      | -0.25                            | -0.11                                                                  | 1.00                     | -                                   | -                                       | -                              |
| Patient risk for hospital admission                                    | -0.03                            | -0.07                     | 0.06                             | -0.01                                                                  | 0.01                     | 1.00                                | -                                       | -                              |
| Consultation rate for common infections                                | 0.54                             | 0.10                      | -0.13                            | =0.04                                                                  | 0.12                     | 0                                   | 1.00                                    | -                              |
| GP coding of common infections                                         | -0.01                            | 0.06                      | -0.26                            | -0.12                                                                  | 0.14                     | -0.02                               | 0.54                                    | 1.00                           |

**Supplementary Table 4: Frequencies that clinicians exceeded prescribing percentile thresholds for six AB measures<sup>#</sup> (percentiles based on the distribution of AB prescribing of all clinicians in study population)**

| Percentile thresholds of AB prescribing across all clinicians (from low to high) |                                     |                                      |                 |                                      |                                      |
|----------------------------------------------------------------------------------|-------------------------------------|--------------------------------------|-----------------|--------------------------------------|--------------------------------------|
| Number of percentile thresholds exceeded                                         | 5 <sup>th</sup> percentile<br>N (%) | 25 <sup>th</sup> percentile<br>N (%) | median<br>N (%) | 75 <sup>th</sup> percentile<br>N (%) | 95 <sup>th</sup> percentile<br>N (%) |
| 0                                                                                | 0 (0)                               | 14 (0.4)                             | 166 (4.2)       | 942 (23.9)                           | 2992 (75.9)                          |
| 1                                                                                | 1 (0)                               | 75 (1.9)                             | 519 (13.2)      | 1193 (30.3)                          | 753 (19.1)                           |
| 2                                                                                | 6 (0.2)                             | 202 (5.1)                            | 818 (20.8)      | 1012 (25.7)                          | 170 (4.3)                            |
| 3                                                                                | 35 (0.9)                            | 572 (14.5)                           | 960 (24.4)      | 534 (13.5)                           | 24 (0.6)                             |
| 4                                                                                | 189 (4.8)                           | 894 (22.7)                           | 792 (20.1)      | 218 (5.5)                            | 3 (0.1)                              |
| 5                                                                                | 678 (17.2)                          | 1145 (29)                            | 499 (12.7)      | 41 (1.0)                             | 0 (0)                                |
| 6                                                                                | 3033 (76.9)                         | 1040 (26.4)                          | 188 (4.8)       | 2 (0.1)                              | 0 (0)                                |

<sup>#</sup>Clinician prescribing relative to the following six AB measures was assessed (for those with data on all measures):

-Standardised rate of AB prescribing by clinician

-Incidental AB prescribing for selected common infection by clinician (%)

-Patients who receive a repeat AB course within 30 days (%)

-Mean number of prior ABs in three years before in patients prescribed an AB

-Median NNT to prevent one infection-related hospital admission in patients prescribed an AB

-Broad spectrum types of all AB prescribed by clinician (%)

**References Supplement**

- [1] G. Abel and M. N. Elliott, "Identifying and quantifying variation between healthcare organisations and geographical regions: using mixed-effects models," *BMJ Qual Saf*, vol. 0, pp. 1–7, 2019, doi: 10.1136/bmjqs-2018-009165.
- [2] M. Charlson, M. T. Wells, R. Ullman, F. King, and C. Shmukler, "The Charlson comorbidity index can be used prospectively to identify patients who will incur high future costs.," *PLoS One*, vol. 9, no. 12, p. e112479, 2014, doi: 10.1371/journal.pone.0112479.
